# Supplementary material
Source: Royal Society of Chemistry journal article supplement (doi:10.1039/d6gc01648k)
Supplement: d6gc01648k1.pdf [file d6gc01648k1.pdf]

Supplementary Information for:

## **Polymers in Ionic Liquids and Ionic Liquids in Polymers: Critical Factors for Compatibility and Materialization**

Masayoshi Watanabe\*

*Advanced Chemical Energy Research Center*

*Institute of Advanced Sciences, Yokohama National University*

75-5 Tokiwadai, Hodogaya-ku, Yokohama, Kanagawa 240-8501, Japan

\*e-mail: [mwatanab@ynu.ac.jp](mailto:mwatanab@ynu.ac.jp)

---

References in the supporting information are cited in the main text.

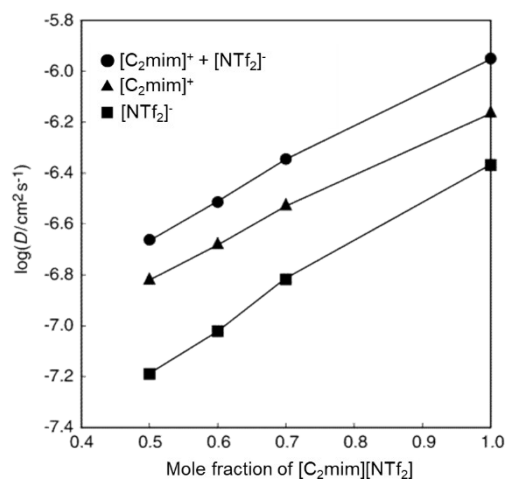

**Fig. S1** Diffusivities of [C<sub>2</sub>mim]<sup>+</sup> cation, [NTf<sub>2</sub>]<sup>-</sup> anion, and their summation in an ion gel consisting of PMMA network and [C<sub>2</sub>mim][NTf<sub>2</sub>] as a function of mole fraction of [C<sub>2</sub>mim][NTf<sub>2</sub>]. Reproduced from ref. 6 with permission from Copyright © 2005, American Chemical Society.

**Table S1** Compatibility of polyethers in ILs. The indicated temperatures are LCST-type phase separation temperatures ( $T_c$ ).

| Polyethers | [C <sub>4</sub> mim][NTf <sub>2</sub> ] | [C <sub>2</sub> mim][NTf <sub>2</sub> ] | [C <sub>4</sub> dmim][NTf <sub>2</sub> ] | [C <sub>4</sub> mim]PF <sub>6</sub> |
|------------|-----------------------------------------|-----------------------------------------|------------------------------------------|-------------------------------------|
| PEO        | <b>Miscible</b>                         |                                         |                                          |                                     |
| PEGE       | 167.4 °C                                | 84.4 °C                                 | 23.2 °C                                  |                                     |
| PPO        | 48.0 °C                                 | <b>Phase separation</b>                 |                                          |                                     |

**Table S2** Commercially used electrolytes in EDLCs.

|                                         | Aqueous electrolyte                                                                                                          | Organic electrolyte                                                                                                                                                                            |
|-----------------------------------------|------------------------------------------------------------------------------------------------------------------------------|------------------------------------------------------------------------------------------------------------------------------------------------------------------------------------------------|
| Typical example                         | Dilute sulfuric acid                                                                                                         | Et <sub>4</sub> NBF <sub>4</sub> /PC                                                                                                                                                           |
| Decomposition voltage (per single cell) | 1.23 V                                                                                                                       | ~4.0 V                                                                                                                                                                                         |
| Practical operating voltage             | 0.6 ~ 0.8 V                                                                                                                  | 2.0 ~ 2.5 V                                                                                                                                                                                    |
| Features                                | <ul style="list-style-type: none"> <li>• Low internal resistance (advantage in power density)</li> <li>• Low cost</li> </ul> | <ul style="list-style-type: none"> <li>• High decomposition voltage (advantage in energy density)</li> <li>• Use of inexpensive metals such as Al as current collector is possible.</li> </ul> |

**Table S3** General comparison of batteries, EDLCs, and electrolytic capacitors.

|                                       | Lead-acid battery | EDLC       | Electrolytic capacitor |
|---------------------------------------|-------------------|------------|------------------------|
| Capacitance (F)                       | > 10              | 0.01~10000 | < 0.1                  |
| Charge time                           | 1~10 h            | 0.1~20 min | < 1 ms                 |
| Discharge time                        | 0.3~3 h           | 0.1~20 min | < 1 ms                 |
| Energy density (Wh kg <sup>-1</sup> ) | 10~40             | 0.2~10     | <0.1                   |
| Power density (W kg <sup>-1</sup> )   | 50~130            | 100~2000   | <100000                |
| Charge/discharge efficiency (%)       | 85~90             | 97~99      | >99                    |
| Cycle life                            | 200~1000          | >100000    | >100000                |

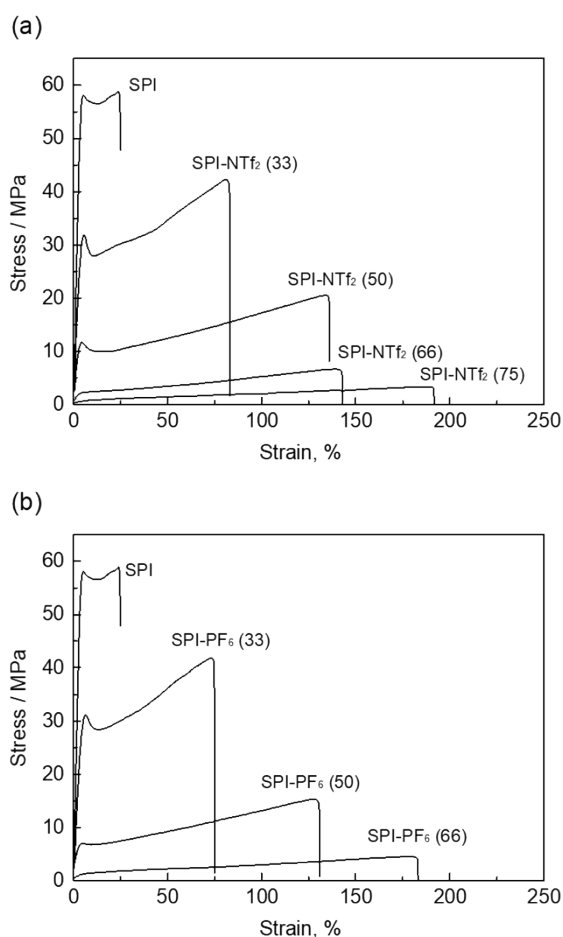

**Fig. S2** Stress-strain curves for SPI/[C<sub>4</sub>mim][NTf<sub>2</sub>] (a) and SPI/[C<sub>4</sub>mim][PF<sub>6</sub>] composite membranes. Samples were cut into dumbbell shapes (JIS K6251) and measured at a stretching head speed of 1 mm s<sup>-1</sup>. Reproduced from ref. 83 with permission from Copyright © 2017, Springer Nature.

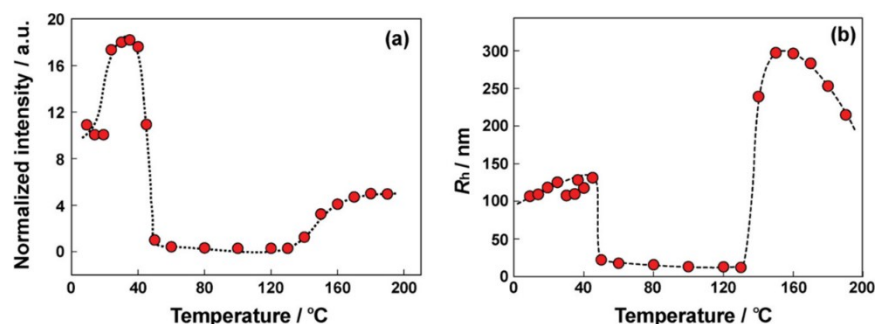

**Fig. S3** Temperature dependence for 1 wt % PBnMA-*block*-P(NIPAm-*r*-AAm) solution in [C<sub>2</sub>mim][NTf<sub>2</sub>]: (a) normalized scattering intensity and (b) hydrodynamic radius ( $R_h$ ) of the solute. Reproduced from ref. 93 with permission from Copyright © 2009, American Chemical Society.

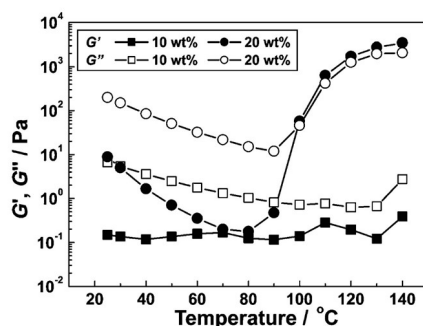

**Fig. S4** Variation of dynamic storage ( $G'$ , solid symbol) and loss ( $G''$ , open symbols) moduli of 10 wt% and 20 wt% PBnMA-*block*-PMMA-*block*-PBnMA solutions in [C<sub>2</sub>mim][NTf<sub>2</sub>] as a function of temperature at a frequency of  $\omega = 6.28 \text{ rad s}^{-1}$  and a strain amplitude of  $\gamma = 1\%$ . Reproduced from ref. 95 with permission from Copyright © 2012, Royal Society of Chemistry.

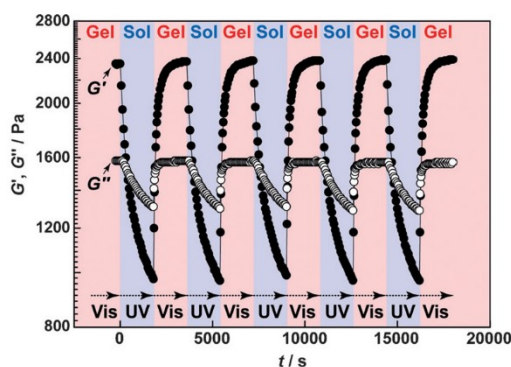

**Fig. S5** Reversible sol-gel transition cycle of a 20 wt% P(AzoMA-*r*-NIPAm)-*block*-PEO-*block*-P(AzoMA-*r*-NIPAm) solution in [C<sub>4</sub>mim][PF<sub>6</sub>] by alternately switching between UV and visible-light irradiation at 53.8 °C. Period of UV and visible-light irradiation indicated by arrows. Reproduced from ref. 100 with permission from Copyright © 2015, Wiley.
